# Supplementary material
Source: PubMed Central journal article supplement (PMC1323476)
Supplement: ppat.0010042.sg001.pdf [file ppat.0010042.sg001.pdf]

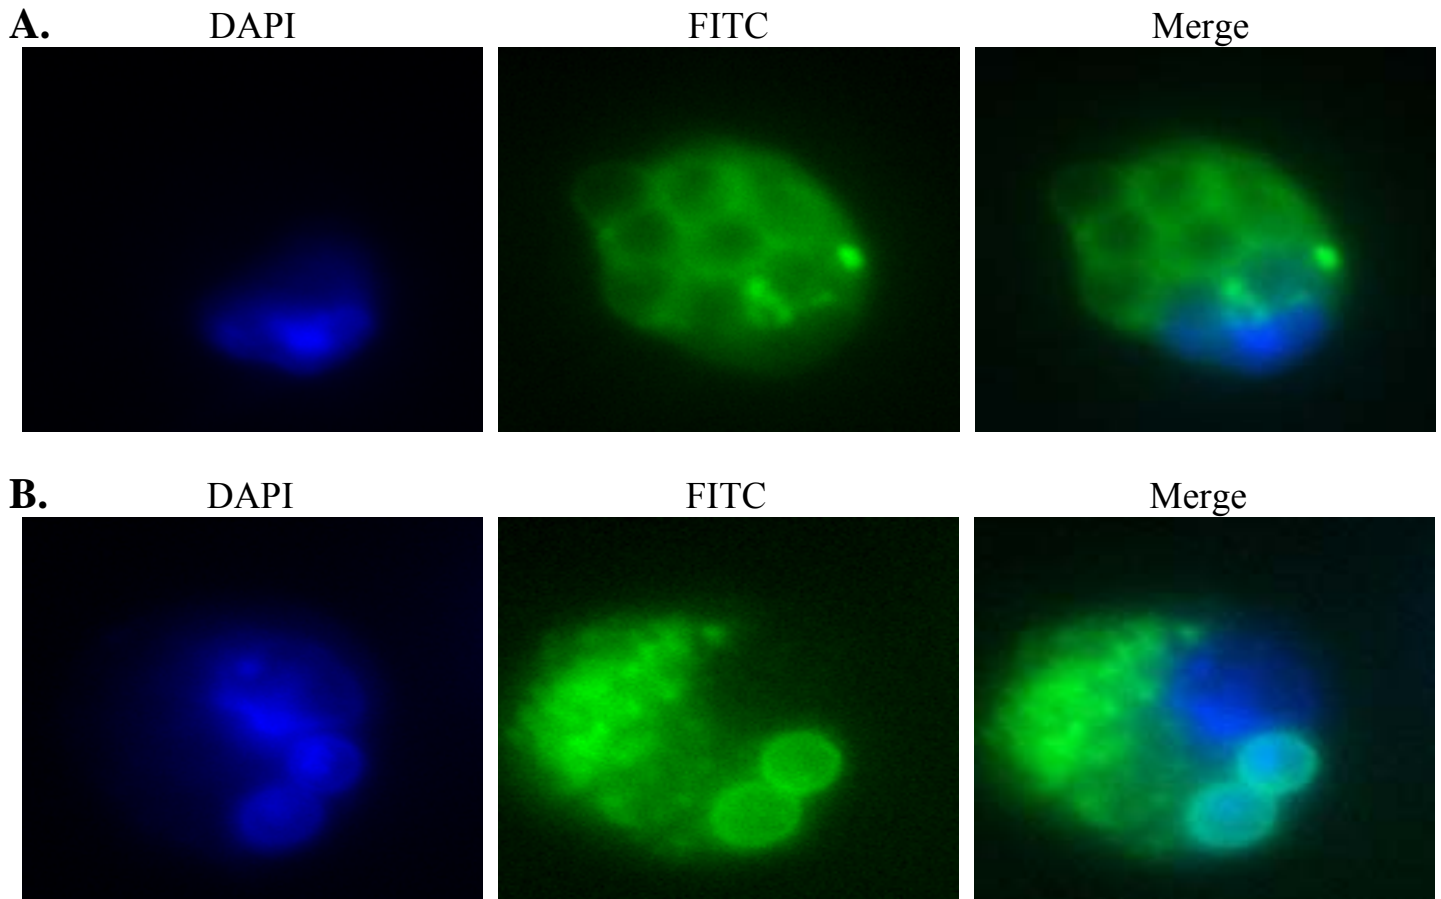

**Supplemental Figure 1. Internalization of *A. fumigatus* by alveolar macrophages.** Alveolar macrophages were adhered to glass slides and thereafter treated with dimethyl sulfoxide (DMSO – vehicle) or cytochalasin D (10  $\mu$ M) for 1 h at 37°C. Fluorescein isothiocyanate (FITC)-conjugated *A. fumigatus* conidia were added at a macrophage to conidia ratio of 1:10 for 1 h at 37°C. Imaging was performed using a Zeiss Axioplan 2 upright fluorescent deconvolution microscope and images were captured using 3I Slidebook Version 4.0 software. Representative micrographs show vehicle (A) and cytochalasin D (B) treated alveolar macrophages. Left, middle and right images correspond to the nuclear stain DAPI, FITC and the merged image. Magnification is 630X oil immersion for all frames.
